# Supplementary material
Source: HighWire-hosted journal article supplement (https://ejhp.bmj.com/highwire/filestream/153729/field_highwire_adjunct_files/2/ejhpharm-2022-003648supp003_data_supplement.pdf)
Supplement: ejhpharm-2022-003648supp003_data_supplement.pdf [file ejhpharm-2022-003648supp003_data_supplement.pdf]

## Appendix 3. Level 2 assessment for module 3.

|   | Mistake                                                                                        | Explanation                                                                 |
|---|------------------------------------------------------------------------------------------------|-----------------------------------------------------------------------------|
| 1 | The operator is wearing a ring/a watch/jewelry                                                 | A ring/a watch/jewelry can contaminate sterile gloves                       |
| 2 | The gloved hand touches the bare hand while donning the second glove                           | The bare hand can contaminate the gloved hand                               |
| 3 | The donning of the first glove is corrected with the bare hand                                 | The bare hand can contaminate the gloved hand                               |
| 4 | The operator touches their clothes or the table with the gloves                                | Particles on clothes or on the table can contaminate the gloves             |
| 5 | The operator touches the first glove's inner part (with a finger or knuckles) when grabbing it | The operator can contaminate the first sterile glove                        |
| 6 | The gloves are open on a non-sterile or non-disinfected surface                                | Bacteria on the surface can contaminate the gloves                          |
| 7 | The second, bare hand adjusts the cuff on the wrist of the first, gloved hand                  | The non-gloved hand touching the inner part of the glove can contaminate it |
